# Supplementary material for: Interaction of a solid supported liquid-crystalline phospholipid membrane with physical vapor deposited metal atoms
Source: Royal Society of Chemistry journal article supplement (doi:10.1039/c0cc03253k), 2010-01-01
Supplement: c0cc03253k.pdf [file c0cc03253k.pdf]

## Electronic Supplementary Information

### Interaction of solid supported liquid-crystalline phospholipid membrane with physical vapor deposited metal atoms<sup>†</sup>

Hyeun Hwan An,<sup>a</sup> Jung Hoon Kim,<sup>a</sup> Jong Ho Lee,<sup>a</sup> Dae Hoon Kwon,<sup>a</sup> Hee-Soo Kim,<sup>a</sup> Young Ho Kim and Chong Seung Yoon<sup>\*a</sup>

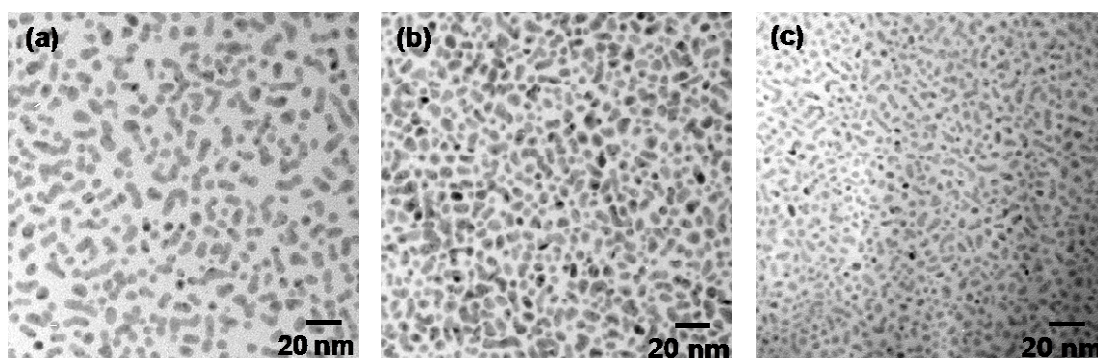

**Figure. S1.** TEM images of nanoparticles formed from metals deposited on the DOPC membrane.

(a) Ag 3 nm, (b) Au 3 nm, (c) Pd 1 nm

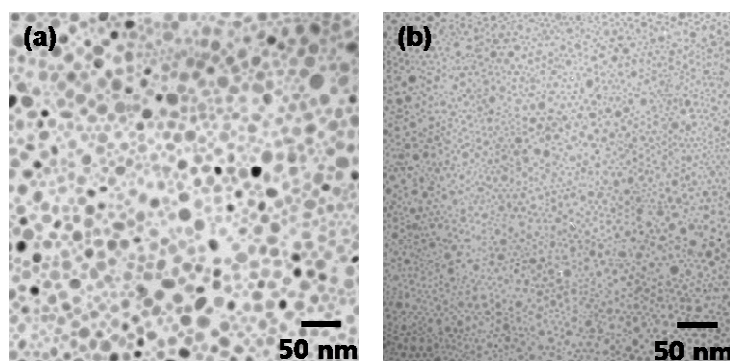

**Figure. S2.** TEM images of nanoparticles formed from metals deposited on the DOPC membrane.

(a) Sn 5 nm, (b) In 5 nm

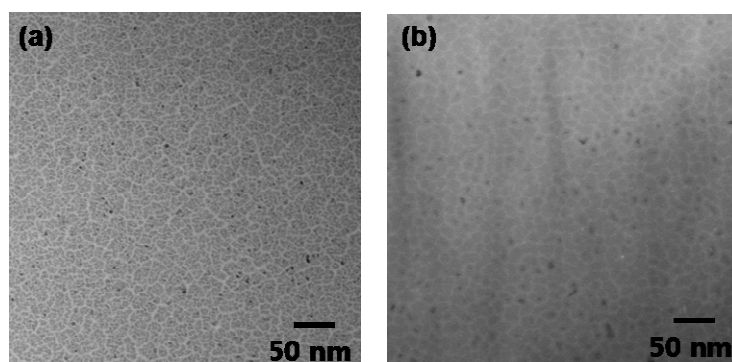

**Figure. S3.** TEM images of nanoparticles formed from metals deposited on the DOPC membrane.

(a)Co 6 nm, (b) Al 5 nm
